# Supplementary material for: Genetically‐Proxied Levels of Vitamin D and Risk of Intracerebral Hemorrhage
Source: PubMed Central journal article supplement — J Am Heart Assoc. 2022 Jun 22;11(13):e024141. doi: 10.1161/JAHA.121.024141 (PMC9333362; doi:10.1161/jaha.121.024141), 2022-06-22

# **SUPPLEMENTAL MATERIAL**

**Table S1. List of single nucleotide polymorphisms used in the study (all ICH).**

| SNP         | Chr | Position  | Effect allele | Other allele | Beta exposure | SE exposure | Beta outcome | SE outcome | EAF      |
|-------------|-----|-----------|---------------|--------------|---------------|-------------|--------------|------------|----------|
| rs10070734  | 5   | 87940026  | T             | C            | -0.0104228    | 0.00216827  | -0.1205      | 0.0577     | 0.290475 |
| rs10085881  | 7   | 21577960  | T             | C            | 0.0141794     | 0.00220864  | 0.0164       | 0.0618     | 0.717835 |
| rs1038165   | 12  | 68665940  | C             | T            | -0.0113988    | 0.00199136  | 0.0968       | 0.052      | 0.416644 |
| rs10426     | 19  | 51517798  | G             | A            | -0.0245957    | 0.00239857  | 0.0126       | 0.0612     | 0.786581 |
| rs10454087  | 17  | 40735641  | C             | T            | 0.0116466     | 0.00217735  | -0.07        | 0.0569     | 0.715204 |
| rs10859995  | 12  | 96375682  | T             | C            | 0.0402233     | 0.00199365  | 0.0142       | 0.0522     | 0.41738  |
| rs10887718  | 10  | 82042624  | C             | T            | 0.0114771     | 0.00197171  | -0.0461      | 0.051      | 0.471793 |
| rs10908419  | 1   | 154567699 | G             | A            | 0.0113875     | 0.0019657   | -0.0397      | 0.0508     | 0.510028 |
| rs10908465  | 1   | 155389688 | C             | T            | -0.0157145    | 0.0022193   | -0.0097      | 0.0581     | 0.732654 |
| rs11127186  | 2   | 28881407  | T             | C            | -0.0110975    | 0.00200676  | -0.0244      | 0.0523     | 0.504215 |
| rs11182428  | 12  | 38526387  | T             | C            | 0.0118222     | 0.00196738  | 0.0191       | 0.0512     | 0.479988 |
| rs11264322  | 1   | 155087933 | G             | A            | 0.00983463    | 0.00199554  | 0.0545       | 0.0529     | 0.570174 |
| rs1149605   | 11  | 76485216  | T             | C            | -0.0203649    | 0.00262634  | 0.0276       | 0.0704     | 0.829642 |
| rs116970203 | 11  | 14876718  | G             | A            | 0.344103      | 0.00604043  | 0.0773       | 0.2071     | 0.972854 |
| rs11732896  | 4   | 88287993  | G             | A            | 0.015001      | 0.00214451  | -0.1398      | 0.0568     | 0.701193 |
| rs12056768  | 8   | 116988527 | T             | G            | 0.0216054     | 0.0019971   | -0.0592      | 0.0514     | 0.417109 |
| rs12317268  | 12  | 21352541  | A             | G            | 0.0192946     | 0.00274768  | 0.0515       | 0.0712     | 0.849004 |
| rs12372115  | 12  | 97982701  | G             | T            | 0.0207748     | 0.00382803  | -0.0558      | 0.1016     | 0.929278 |
| rs1260326   | 2   | 27730940  | T             | C            | -0.0205984    | 0.00200946  | -0.0035      | 0.0519     | 0.393449 |
| rs12794714  | 11  | 14913575  | G             | A            | 0.0692066     | 0.00198946  | -0.0452      | 0.0522     | 0.578149 |
| rs12803256  | 11  | 71132868  | A             | G            | -0.103558     | 0.0023682   | 0.0214       | 0.0566     | 0.223276 |
| rs12881545  | 14  | 101176212 | G             | C            | -0.00951387   | 0.00210312  | 0.0474       | 0.0556     | 0.326518 |
| rs13060130  | 3   | 84440527  | C             | T            | 0.0135967     | 0.00283432  | 0.0212       | 0.0751     | 0.860343 |
| rs13104260  | 4   | 70348090  | G             | A            | -0.00648517   | 0.00225343  | -0.0178      | 0.0602     | 0.743081 |
| rs13284054  | 9   | 107669073 | T             | C            | -0.0178056    | 0.00309215  | 0.1106       | 0.0792     | 0.882245 |
| rs1352846   | 4   | 72617775  | A             | G            | 0.183861      | 0.00216171  | -0.0726      | 0.0574     | 0.708555 |

|            |    |           |   |   |             |            |         |        |          |
|------------|----|-----------|---|---|-------------|------------|---------|--------|----------|
| rs1660839  | 11 | 71094232  | G | A | -0.0289517  | 0.00227489 | -0.0572 | 0.0592 | 0.751121 |
| rs17216707 | 20 | 52732362  | T | C | 0.0362329   | 0.00260201 | 0.0284  | 0.0653 | 0.817326 |
| rs17231506 | 16 | 56994528  | C | T | 0.0178297   | 0.00210314 | -0.1682 | 0.0553 | 0.676898 |
| rs1800588  | 15 | 58723675  | C | T | 0.0308346   | 0.00238954 | -0.0066 | 0.0623 | 0.784792 |
| rs2012736  | 2  | 234622379 | C | A | 0.0455066   | 0.00361616 | -0.2135 | 0.0917 | 0.919152 |
| rs2037511  | 18 | 61366207  | G | A | -0.0168582  | 0.00264423 | 0.0672  | 0.068  | 0.834022 |
| rs2074735  | 22 | 31535872  | G | C | -0.0275007  | 0.00401718 | -0.0472 | 0.0962 | 0.935944 |
| rs212100   | 19 | 48376995  | T | C | 0.0602544   | 0.00265433 | -0.0692 | 0.0701 | 0.164003 |
| rs2131925  | 1  | 63025942  | G | T | 0.0211261   | 0.00205682 | 0.0489  | 0.0546 | 0.356411 |
| rs2229742  | 21 | 16339172  | G | C | 0.0240457   | 0.00322702 | -0.056  | 0.0839 | 0.896533 |
| rs2248551  | 6  | 131924689 | G | A | 0.0203669   | 0.00264676 | -0.0848 | 0.0718 | 0.834819 |
| rs2346264  | 7  | 133536351 | A | C | 0.0142533   | 0.00240377 | -0.0685 | 0.0629 | 0.217301 |
| rs261291   | 15 | 58680178  | T | C | 0.0256413   | 0.00205788 | -0.0452 | 0.0537 | 0.644799 |
| rs2710651  | 2  | 63166379  | G | A | 0.0113064   | 0.00196984 | 0.0072  | 0.0516 | 0.471888 |
| rs2725371  | 8  | 30854033  | A | G | -0.00861253 | 0.00215382 | -0.0221 | 0.0567 | 0.302285 |
| rs28692966 | 8  | 25892919  | G | A | -0.0140087  | 0.00226945 | 0.0194  | 0.0588 | 0.747024 |
| rs2952289  | 17 | 66464414  | C | T | -0.0159269  | 0.00245912 | -0.0007 | 0.0636 | 0.201966 |
| rs31612    | 5  | 108996643 | T | C | 0.0124544   | 0.00261401 | 0.0836  | 0.0649 | 0.825572 |
| rs325384   | 15 | 100229761 | C | T | 0.0126665   | 0.00218846 | -0.0025 | 0.0594 | 0.715856 |
| rs34290760 | 8  | 9185179   | C | G | 0.0281839   | 0.00585264 | -0.1958 | 0.152  | 0.970879 |
| rs35408430 | 1  | 17560195  | C | T | 0.0207679   | 0.00207182 | -0.0059 | 0.0544 | 0.657829 |
| rs3849374  | 2  | 101443397 | G | C | 0.0159963   | 0.00258093 | -0.0575 | 0.0665 | 0.82199  |
| rs3925446  | 10 | 91495322  | G | A | -0.0147869  | 0.002463   | -0.0645 | 0.0653 | 0.800891 |
| rs4121823  | 18 | 47144223  | T | A | 0.0165318   | 0.00274098 | -0.2047 | 0.0742 | 0.154674 |
| rs4327060  | 16 | 72807438  | C | T | 0.0226633   | 0.00433397 | 0.0222  | 0.1156 | 0.945604 |
| rs4418728  | 10 | 94839724  | G | T | -0.0111594  | 0.00197359 | -0.0163 | 0.0517 | 0.54832  |
| rs4575545  | 16 | 79755446  | G | A | 0.0145918   | 0.00214424 | -0.0749 | 0.0555 | 0.695191 |
| rs4616820  | 4  | 57745481  | C | T | 0.012479    | 0.00199079 | -0.0668 | 0.0511 | 0.535048 |

|            |    |           |   |   |             |            |         |        |          |
|------------|----|-----------|---|---|-------------|------------|---------|--------|----------|
| rs4738684  | 8  | 59393273  | A | G | -0.00994588 | 0.00208683 | -0.0263 | 0.0548 | 0.334508 |
| rs541041   | 2  | 21294975  | G | A | 0.0152241   | 0.00255168 | 0.1396  | 0.0648 | 0.180809 |
| rs55829990 | 15 | 63790642  | T | C | 0.0191915   | 0.00207492 | 0.0014  | 0.0534 | 0.655979 |
| rs590215   | 18 | 57904088  | C | T | 0.00462051  | 0.00222766 | 0.0376  | 0.0594 | 0.734097 |
| rs6003456  | 22 | 23356100  | T | A | 0.0122883   | 0.00233244 | 0.0044  | 0.0621 | 0.765364 |
| rs613808   | 11 | 116710968 | A | G | -0.024948   | 0.00220937 | 0.0611  | 0.0568 | 0.279985 |
| rs61891388 | 11 | 66079818  | T | G | -0.0115084  | 0.00198127 | -0.0305 | 0.0512 | 0.544054 |
| rs62007299 | 15 | 77711719  | G | A | 0.0116231   | 0.00217065 | 0.0026  | 0.0561 | 0.287451 |
| rs6672758  | 1  | 230303512 | C | T | -0.0146302  | 0.0024755  | -0.1018 | 0.0652 | 0.199137 |
| rs6782190  | 3  | 85639672  | G | A | 0.0189106   | 0.00205644 | -0.0508 | 0.0535 | 0.352497 |
| rs6966728  | 7  | 104618318 | C | T | 0.0113076   | 0.00201049 | 0.0331  | 0.0513 | 0.537355 |
| rs705117   | 4  | 72608115  | C | T | 0.0317739   | 0.00276853 | -0.1415 | 0.076  | 0.147721 |
| rs7149014  | 14 | 29802911  | T | C | 0.0107334   | 0.0020584  | 0.107   | 0.0527 | 0.370816 |
| rs727857   | 2  | 58981967  | G | A | 0.0109766   | 0.00203429 | -0.0366 | 0.0521 | 0.388495 |
| rs72834856 | 6  | 22801858  | T | G | 0.0251376   | 0.00379985 | -0.0443 | 0.1004 | 0.927943 |
| rs72997623 | 11 | 75488054  | C | A | -0.0257654  | 0.00353337 | -0.0747 | 0.0884 | 0.915323 |
| rs7522116  | 1  | 41835685  | C | T | 0.012542    | 0.00199858 | 0.1379  | 0.0512 | 0.433716 |
| rs7528419  | 1  | 109817192 | A | G | -0.019866   | 0.00235556 | 0.0535  | 0.0635 | 0.775305 |
| rs7569755  | 2  | 118648261 | G | A | -0.0135962  | 0.00218248 | 0.0408  | 0.0566 | 0.709372 |
| rs75741381 | 7  | 100809458 | C | G | 0.0137731   | 0.00278718 | -0.0734 | 0.0719 | 0.852317 |
| rs7604788  | 2  | 21190024  | C | T | -0.0352194  | 0.0054801  | 0.0043  | 0.1444 | 0.966596 |
| rs77532868 | 10 | 88081438  | C | T | -0.0230071  | 0.0043429  | 0.1841  | 0.1357 | 0.945978 |
| rs7784802  | 7  | 64015379  | A | T | -0.0129774  | 0.00204446 | 0.1022  | 0.0555 | 0.639012 |
| rs78151190 | 6  | 25619007  | A | C | 0.0179172   | 0.00293406 | 0.0453  | 0.0806 | 0.871246 |
| rs78649910 | 4  | 3482213   | T | A | 0.019983    | 0.00320891 | 0.0187  | 0.0798 | 0.893826 |
| rs8018720  | 14 | 39556185  | G | C | 0.0299593   | 0.0025742  | 0.0551  | 0.0683 | 0.176691 |
| rs804281   | 8  | 11611865  | A | G | -0.0161836  | 0.00199452 | 0.0112  | 0.052  | 0.416402 |
| rs8091117  | 18 | 28919794  | C | A | 0.0241938   | 0.0039757  | 0.0304  | 0.0989 | 0.934736 |

|           |    |           |   |   |            |            |         |        |          |
|-----------|----|-----------|---|---|------------|------------|---------|--------|----------|
| rs8113404 | 19 | 53065579  | C | T | -0.0115758 | 0.00214261 | 0.0021  | 0.0557 | 0.695417 |
| rs867772  | 1  | 220972343 | A | G | 0.0147054  | 0.00212274 | -0.1692 | 0.0572 | 0.315533 |
| rs9476310 | 6  | 57767576  | C | T | -0.0108729 | 0.00197437 | 0.0076  | 0.0509 | 0.488661 |
| rs9490317 | 6  | 121859499 | T | C | -0.0106658 | 0.00198507 | -0.0455 | 0.0514 | 0.554066 |
| rs964184  | 11 | 116648917 | G | C | -0.0414009 | 0.00290504 | 0.0353  | 0.0728 | 0.131625 |
| rs9861009 | 3  | 141654685 | T | C | -0.0139778 | 0.00222312 | 0.0175  | 0.0566 | 0.272456 |

| <b>Table S2. List of single nucleotide polymorphisms used in the study (Non-Lobar ICH).</b> |     |           |               |              |               |             |              |            |          |
|---------------------------------------------------------------------------------------------|-----|-----------|---------------|--------------|---------------|-------------|--------------|------------|----------|
| SNP                                                                                         | chr | pos       | effect_allele | other_allele | beta.exposure | se.exposure | beta.outcome | se.outcome | eaf      |
| rs10070734                                                                                  | 5   | 87940026  | T             | C            | -0.0104228    | 0.00216827  | -0.0818      | 0.0681     | 0.290475 |
| rs10085881                                                                                  | 7   | 21577960  | T             | C            | 0.0141794     | 0.00220864  | -0.0331      | 0.0728     | 0.717835 |
| rs1038165                                                                                   | 12  | 68665940  | C             | T            | -0.0113988    | 0.00199136  | 0.1259       | 0.0612     | 0.416644 |
| rs10426                                                                                     | 19  | 51517798  | G             | A            | -0.0245957    | 0.00239857  | -0.0196      | 0.0721     | 0.786581 |
| rs10454087                                                                                  | 17  | 40735641  | C             | T            | 0.0116466     | 0.00217735  | -0.0748      | 0.0675     | 0.715204 |
| rs10859995                                                                                  | 12  | 96375682  | T             | C            | 0.0402233     | 0.00199365  | -0.0138      | 0.0622     | 0.41738  |
| rs10887718                                                                                  | 10  | 82042624  | C             | T            | 0.0114771     | 0.00197171  | -0.0427      | 0.0605     | 0.471793 |
| rs10908419                                                                                  | 1   | 154567699 | G             | A            | 0.0113875     | 0.0019657   | -0.0076      | 0.0603     | 0.510028 |
| rs10908465                                                                                  | 1   | 155389688 | C             | T            | -0.0157145    | 0.0022193   | -0.055       | 0.0687     | 0.732654 |
| rs11127186                                                                                  | 2   | 28881407  | T             | C            | -0.0110975    | 0.00200676  | 0.0285       | 0.0629     | 0.504215 |
| rs11182428                                                                                  | 12  | 38526387  | T             | C            | 0.0118222     | 0.00196738  | -0.049       | 0.061      | 0.479988 |
| rs11264322                                                                                  | 1   | 155087933 | G             | A            | 0.00983463    | 0.00199554  | 0.0807       | 0.0626     | 0.570174 |
| rs1149605                                                                                   | 11  | 76485216  | T             | C            | -0.0203649    | 0.00262634  | -0.0901      | 0.0817     | 0.829642 |
| rs116970203                                                                                 | 11  | 14876718  | G             | A            | 0.344103      | 0.00604043  | -0.0823      | 0.2469     | 0.972854 |
| rs11732896                                                                                  | 4   | 88287993  | G             | A            | 0.015001      | 0.00214451  | -0.1184      | 0.0682     | 0.701193 |
| rs12056768                                                                                  | 8   | 116988527 | T             | G            | 0.0216054     | 0.0019971   | -0.0869      | 0.0613     | 0.417109 |
| rs12317268                                                                                  | 12  | 21352541  | A             | G            | 0.0192946     | 0.00274768  | 0.0683       | 0.0823     | 0.849004 |
| rs12372115                                                                                  | 12  | 97982701  | G             | T            | 0.0207748     | 0.00382803  | -0.0514      | 0.1195     | 0.929278 |
| rs1260326                                                                                   | 2   | 27730940  | T             | C            | -0.0205984    | 0.00200946  | 0.0164       | 0.0615     | 0.393449 |
| rs12794714                                                                                  | 11  | 14913575  | G             | A            | 0.0692066     | 0.00198946  | -0.0873      | 0.0618     | 0.578149 |
| rs12803256                                                                                  | 11  | 71132868  | A             | G            | -0.103558     | 0.0023682   | 0.0076       | 0.0671     | 0.223276 |
| rs12881545                                                                                  | 14  | 101176212 | G             | C            | -0.00951387   | 0.00210312  | 0.0026       | 0.0656     | 0.326518 |
| rs13060130                                                                                  | 3   | 84440527  | C             | T            | 0.0135967     | 0.00283432  | -0.0437      | 0.0885     | 0.860343 |
| rs13104260                                                                                  | 4   | 70348090  | G             | A            | -0.00648517   | 0.00225343  | 0.0077       | 0.0708     | 0.743081 |
| rs13284054                                                                                  | 9   | 107669073 | T             | C            | -0.0178056    | 0.00309215  | 0.1024       | 0.094      | 0.882245 |
| rs1352846                                                                                   | 4   | 72617775  | A             | G            | 0.183861      | 0.00216171  | -0.0736      | 0.0691     | 0.708555 |

|            |    |           |   |   |             |            |         |        |          |
|------------|----|-----------|---|---|-------------|------------|---------|--------|----------|
| rs1660839  | 11 | 71094232  | G | A | -0.0289517  | 0.00227489 | -0.0853 | 0.07   | 0.751121 |
| rs17216707 | 20 | 52732362  | T | C | 0.0362329   | 0.00260201 | 0.0227  | 0.077  | 0.817326 |
| rs17231506 | 16 | 56994528  | C | T | 0.0178297   | 0.00210314 | -0.1847 | 0.0658 | 0.676898 |
| rs1800588  | 15 | 58723675  | C | T | 0.0308346   | 0.00238954 | 0.0271  | 0.0744 | 0.784792 |
| rs2012736  | 2  | 234622379 | C | A | 0.0455066   | 0.00361616 | -0.201  | 0.1103 | 0.919152 |
| rs2037511  | 18 | 61366207  | G | A | -0.0168582  | 0.00264423 | 0.0927  | 0.0815 | 0.834022 |
| rs2074735  | 22 | 31535872  | G | C | -0.0275007  | 0.00401718 | -0.0833 | 0.1136 | 0.935944 |
| rs212100   | 19 | 48376995  | T | C | 0.0602544   | 0.00265433 | -0.1506 | 0.0841 | 0.164003 |
| rs2131925  | 1  | 63025942  | G | T | 0.0211261   | 0.00205682 | 0.0128  | 0.0652 | 0.356411 |
| rs2229742  | 21 | 16339172  | G | C | 0.0240457   | 0.00322702 | -0.0779 | 0.0993 | 0.896533 |
| rs2248551  | 6  | 131924689 | G | A | 0.0203669   | 0.00264676 | -0.0899 | 0.0851 | 0.834819 |
| rs2346264  | 7  | 133536351 | A | C | 0.0142533   | 0.00240377 | -0.0387 | 0.0743 | 0.217301 |
| rs261291   | 15 | 58680178  | T | C | 0.0256413   | 0.00205788 | -0.0694 | 0.063  | 0.644799 |
| rs2710651  | 2  | 63166379  | G | A | 0.0113064   | 0.00196984 | 0.0107  | 0.0617 | 0.471888 |
| rs2725371  | 8  | 30854033  | A | G | -0.00861253 | 0.00215382 | -0.0085 | 0.0669 | 0.302285 |
| rs28692966 | 8  | 25892919  | G | A | -0.0140087  | 0.00226945 | 0.0011  | 0.0695 | 0.747024 |
| rs2952289  | 17 | 66464414  | C | T | -0.0159269  | 0.00245912 | -0.0651 | 0.0764 | 0.201966 |
| rs31612    | 5  | 108996643 | T | C | 0.0124544   | 0.00261401 | 0.0423  | 0.077  | 0.825572 |
| rs325384   | 15 | 100229761 | C | T | 0.0126665   | 0.00218846 | 0.066   | 0.0707 | 0.715856 |
| rs34290760 | 8  | 9185179   | C | G | 0.0281839   | 0.00585264 | -0.3061 | 0.1803 | 0.970879 |
| rs35408430 | 1  | 17560195  | C | T | 0.0207679   | 0.00207182 | -0.0172 | 0.0647 | 0.657829 |
| rs3849374  | 2  | 101443397 | G | C | 0.0159963   | 0.00258093 | -0.0952 | 0.0795 | 0.82199  |
| rs3925446  | 10 | 91495322  | G | A | -0.0147869  | 0.002463   | -0.0539 | 0.0772 | 0.800891 |
| rs4121823  | 18 | 47144223  | T | A | 0.0165318   | 0.00274098 | -0.1955 | 0.0873 | 0.154674 |
| rs4327060  | 16 | 72807438  | C | T | 0.0226633   | 0.00433397 | 0.0176  | 0.1381 | 0.945604 |
| rs4418728  | 10 | 94839724  | G | T | -0.0111594  | 0.00197359 | 0.0501  | 0.0615 | 0.54832  |
| rs4575545  | 16 | 79755446  | G | A | 0.0145918   | 0.00214424 | -0.1114 | 0.0659 | 0.695191 |
| rs4616820  | 4  | 57745481  | C | T | 0.012479    | 0.00199079 | -0.0935 | 0.0609 | 0.535048 |

|            |    |           |   |   |             |            |         |        |          |
|------------|----|-----------|---|---|-------------|------------|---------|--------|----------|
| rs4738684  | 8  | 59393273  | A | G | -0.00994588 | 0.00208683 | -0.0346 | 0.0647 | 0.334508 |
| rs541041   | 2  | 21294975  | G | A | 0.0152241   | 0.00255168 | 0.1757  | 0.0762 | 0.180809 |
| rs55829990 | 15 | 63790642  | T | C | 0.0191915   | 0.00207492 | 0.0058  | 0.0633 | 0.655979 |
| rs590215   | 18 | 57904088  | C | T | 0.00462051  | 0.00222766 | 0.019   | 0.0701 | 0.734097 |
| rs6003456  | 22 | 23356100  | T | A | 0.0122883   | 0.00233244 | 0.0004  | 0.0736 | 0.765364 |
| rs613808   | 11 | 116710968 | A | G | -0.024948   | 0.00220937 | 0.0335  | 0.0676 | 0.279985 |
| rs61891388 | 11 | 66079818  | T | G | -0.0115084  | 0.00198127 | -0.014  | 0.0605 | 0.544054 |
| rs62007299 | 15 | 77711719  | G | A | 0.0116231   | 0.00217065 | -0.0568 | 0.0668 | 0.287451 |
| rs6672758  | 1  | 230303512 | C | T | -0.0146302  | 0.0024755  | -0.0536 | 0.0762 | 0.199137 |
| rs6782190  | 3  | 85639672  | G | A | 0.0189106   | 0.00205644 | -0.0695 | 0.0638 | 0.352497 |
| rs6966728  | 7  | 104618318 | C | T | 0.0113076   | 0.00201049 | 0.055   | 0.0612 | 0.537355 |
| rs705117   | 4  | 72608115  | C | T | 0.0317739   | 0.00276853 | -0.1853 | 0.0916 | 0.147721 |
| rs7149014  | 14 | 29802911  | T | C | 0.0107334   | 0.0020584  | 0.0851  | 0.0628 | 0.370816 |
| rs727857   | 2  | 58981967  | G | A | 0.0109766   | 0.00203429 | -0.0385 | 0.0624 | 0.388495 |
| rs72834856 | 6  | 22801858  | T | G | 0.0251376   | 0.00379985 | -0.0071 | 0.1196 | 0.927943 |
| rs72997623 | 11 | 75488054  | C | A | -0.0257654  | 0.00353337 | -0.0625 | 0.103  | 0.915323 |
| rs7522116  | 1  | 41835685  | C | T | 0.012542    | 0.00199858 | 0.1126  | 0.0618 | 0.433716 |
| rs7528419  | 1  | 109817192 | A | G | -0.019866   | 0.00235556 | 0.0438  | 0.0754 | 0.775305 |
| rs7569755  | 2  | 118648261 | G | A | -0.0135962  | 0.00218248 | 0.0771  | 0.0678 | 0.709372 |
| rs75741381 | 7  | 100809458 | C | G | 0.0137731   | 0.00278718 | -0.0689 | 0.0861 | 0.852317 |
| rs7604788  | 2  | 21190024  | C | T | -0.0352194  | 0.0054801  | -0.1243 | 0.1688 | 0.966596 |
| rs76798800 | 1  | 154994978 | G | T | 0.00904347  | 0.00222959 | -0.021  | 0.0779 | 0.733722 |
| rs77532868 | 10 | 88081438  | C | T | -0.0230071  | 0.0043429  | 0.2162  | 0.1636 | 0.945978 |
| rs7784802  | 7  | 64015379  | A | T | -0.0129774  | 0.00204446 | 0.0887  | 0.0665 | 0.639012 |
| rs78151190 | 6  | 25619007  | A | C | 0.0179172   | 0.00293406 | 0.1043  | 0.0969 | 0.871246 |
| rs78649910 | 4  | 3482213   | T | A | 0.019983    | 0.00320891 | 0.0171  | 0.0942 | 0.893826 |
| rs8018720  | 14 | 39556185  | G | C | 0.0299593   | 0.0025742  | 0.0576  | 0.0806 | 0.176691 |
| rs804281   | 8  | 11611865  | A | G | -0.0161836  | 0.00199452 | 0.036   | 0.0618 | 0.416402 |



|           |    |           |   |   |            |            |         |        |          |
|-----------|----|-----------|---|---|------------|------------|---------|--------|----------|
| rs8091117 | 18 | 28919794  | C | A | 0.0241938  | 0.0039757  | -0.0204 | 0.1165 | 0.934736 |
| rs8113404 | 19 | 53065579  | C | T | -0.0115758 | 0.00214261 | 0.0223  | 0.0664 | 0.695417 |
| rs867772  | 1  | 220972343 | A | G | 0.0147054  | 0.00212274 | -0.1698 | 0.0687 | 0.315533 |
| rs9476310 | 6  | 57767576  | C | T | -0.0108729 | 0.00197437 | 0.0103  | 0.0602 | 0.488661 |
| rs9490317 | 6  | 121859499 | T | C | -0.0106658 | 0.00198507 | -0.0363 | 0.0617 | 0.554066 |
| rs964184  | 11 | 116648917 | G | C | -0.0414009 | 0.00290504 | -0.0005 | 0.0873 | 0.131625 |
| rs9861009 | 3  | 141654685 | T | C | -0.0139778 | 0.00222312 | 0.0081  | 0.0671 | 0.272456 |

**Table S3. List of single nucleotide polymorphisms used in the study (Lobar ICH).**

| SNP         | Chr | Position  | Effect allele | Other allele | Beta exposure | SE exposure | Beta outcome | SE outcome | EAF      |
|-------------|-----|-----------|---------------|--------------|---------------|-------------|--------------|------------|----------|
| rs10070734  | 5   | 87940026  | T             | C            | -0.0104228    | 0.00216827  | -0.2048      | 0.0762     | 0.290475 |
| rs10085881  | 7   | 21577960  | T             | C            | 0.0141794     | 0.00220864  | 0.0291       | 0.0817     | 0.717835 |
| rs1038165   | 12  | 68665940  | C             | T            | -0.0113988    | 0.00199136  | 0.0508       | 0.0686     | 0.416644 |
| rs10426     | 19  | 51517798  | G             | A            | -0.0245957    | 0.00239857  | 0.0675       | 0.0806     | 0.786581 |
| rs10454087  | 17  | 40735641  | C             | T            | 0.0116466     | 0.00217735  | -0.078       | 0.0734     | 0.715204 |
| rs10859995  | 12  | 96375682  | T             | C            | 0.0402233     | 0.00199365  | 0.0168       | 0.0683     | 0.41738  |
| rs10887718  | 10  | 82042624  | C             | T            | 0.0114771     | 0.00197171  | -0.0903      | 0.0664     | 0.471793 |
| rs10908419  | 1   | 154567699 | G             | A            | 0.0113875     | 0.0019657   | -0.0932      | 0.0666     | 0.510028 |
| rs10908465  | 1   | 155389688 | C             | T            | -0.0157145    | 0.0022193   | 0.0556       | 0.0765     | 0.732654 |
| rs11127186  | 2   | 28881407  | T             | C            | -0.0110975    | 0.00200676  | -0.0933      | 0.0677     | 0.504215 |
| rs11182428  | 12  | 38526387  | T             | C            | 0.0118222     | 0.00196738  | 0.0658       | 0.067      | 0.479988 |
| rs11264322  | 1   | 155087933 | G             | A            | 0.00983463    | 0.00199554  | 0.022        | 0.0691     | 0.570174 |
| rs1149605   | 11  | 76485216  | T             | C            | -0.0203649    | 0.00262634  | 0.1488       | 0.0932     | 0.829642 |
| rs116970203 | 11  | 14876718  | G             | A            | 0.344103      | 0.00604043  | 0.2686       | 0.2844     | 0.972854 |
| rs11732896  | 4   | 88287993  | G             | A            | 0.015001      | 0.00214451  | -0.1945      | 0.0737     | 0.701193 |
| rs12056768  | 8   | 116988527 | T             | G            | 0.0216054     | 0.0019971   | -0.0245      | 0.0674     | 0.417109 |
| rs12317268  | 12  | 21352541  | A             | G            | 0.0192946     | 0.00274768  | -0.0304      | 0.0907     | 0.849004 |
| rs12372115  | 12  | 97982701  | G             | T            | 0.0207748     | 0.00382803  | -0.0678      | 0.1305     | 0.929278 |
| rs1260326   | 2   | 27730940  | T             | C            | -0.0205984    | 0.00200946  | -0.0104      | 0.0687     | 0.393449 |
| rs12794714  | 11  | 14913575  | G             | A            | 0.0692066     | 0.00198946  | 0.0238       | 0.0686     | 0.578149 |
| rs12803256  | 11  | 71132868  | A             | G            | -0.103558     | 0.0023682   | 0.0322       | 0.0738     | 0.223276 |
| rs12881545  | 14  | 101176212 | G             | C            | -0.00951387   | 0.00210312  | 0.1057       | 0.0723     | 0.326518 |
| rs13060130  | 3   | 84440527  | C             | T            | 0.0135967     | 0.00283432  | 0.1168       | 0.1011     | 0.860343 |
| rs13104260  | 4   | 70348090  | G             | A            | -0.00648517   | 0.00225343  | 0.0225       | 0.078      | 0.743081 |
| rs13284054  | 9   | 107669073 | T             | C            | -0.0178056    | 0.00309215  | 0.1181       | 0.1035     | 0.882245 |
| rs1352846   | 4   | 72617775  | A             | G            | 0.183861      | 0.00216171  | -0.0563      | 0.0746     | 0.708555 |

|            |    |           |   |   |             |            |         |        |          |
|------------|----|-----------|---|---|-------------|------------|---------|--------|----------|
| rs1660839  | 11 | 71094232  | G | A | -0.0289517  | 0.00227489 | -0.0418 | 0.0784 | 0.751121 |
| rs17216707 | 20 | 52732362  | T | C | 0.0362329   | 0.00260201 | 0.0702  | 0.0852 | 0.817326 |
| rs17231506 | 16 | 56994528  | C | T | 0.0178297   | 0.00210314 | -0.1814 | 0.072  | 0.676898 |
| rs1800588  | 15 | 58723675  | C | T | 0.0308346   | 0.00238954 | -0.0302 | 0.0813 | 0.784792 |
| rs2012736  | 2  | 234622379 | C | A | 0.0455066   | 0.00361616 | -0.2614 | 0.1188 | 0.919152 |
| rs2037511  | 18 | 61366207  | G | A | -0.0168582  | 0.00264423 | 0.059   | 0.0874 | 0.834022 |
| rs2074735  | 22 | 31535872  | G | C | -0.0275007  | 0.00401718 | 0.0094  | 0.1286 | 0.935944 |
| rs212100   | 19 | 48376995  | T | C | 0.0602544   | 0.00265433 | -0.0348 | 0.091  | 0.164003 |
| rs2131925  | 1  | 63025942  | G | T | 0.0211261   | 0.00205682 | 0.071   | 0.0715 | 0.356411 |
| rs2229742  | 21 | 16339172  | G | C | 0.0240457   | 0.00322702 | -0.0551 | 0.1096 | 0.896533 |
| rs2248551  | 6  | 131924689 | G | A | 0.0203669   | 0.00264676 | -0.0284 | 0.0941 | 0.834819 |
| rs2346264  | 7  | 133536351 | A | C | 0.0142533   | 0.00240377 | -0.1081 | 0.0836 | 0.217301 |
| rs261291   | 15 | 58680178  | T | C | 0.0256413   | 0.00205788 | 0.0126  | 0.0707 | 0.644799 |
| rs2710651  | 2  | 63166379  | G | A | 0.0113064   | 0.00196984 | -0.0152 | 0.0672 | 0.471888 |
| rs2725371  | 8  | 30854033  | A | G | -0.00861253 | 0.00215382 | -0.0395 | 0.0749 | 0.302285 |
| rs28692966 | 8  | 25892919  | G | A | -0.0140087  | 0.00226945 | 0.0271  | 0.0772 | 0.747024 |
| rs2952289  | 17 | 66464414  | C | T | -0.0159269  | 0.00245912 | 0.0433  | 0.0834 | 0.201966 |
| rs31612    | 5  | 108996643 | T | C | 0.0124544   | 0.00261401 | 0.1137  | 0.0864 | 0.825572 |
| rs325384   | 15 | 100229761 | C | T | 0.0126665   | 0.00218846 | -0.0262 | 0.0773 | 0.715856 |
| rs34290760 | 8  | 9185179   | C | G | 0.0281839   | 0.00585264 | -0.1629 | 0.2162 | 0.970879 |
| rs35408430 | 1  | 17560195  | C | T | 0.0207679   | 0.00207182 | 0.0269  | 0.0714 | 0.657829 |
| rs3849374  | 2  | 101443397 | G | C | 0.0159963   | 0.00258093 | -0.0157 | 0.0875 | 0.82199  |
| rs3925446  | 10 | 91495322  | G | A | -0.0147869  | 0.002463   | -0.0243 | 0.0864 | 0.800891 |
| rs4121823  | 18 | 47144223  | T | A | 0.0165318   | 0.00274098 | -0.1894 | 0.0963 | 0.154674 |
| rs4327060  | 16 | 72807438  | C | T | 0.0226633   | 0.00433397 | 0.0107  | 0.1501 | 0.945604 |
| rs4418728  | 10 | 94839724  | G | T | -0.0111594  | 0.00197359 | -0.0855 | 0.0674 | 0.54832  |
| rs4575545  | 16 | 79755446  | G | A | 0.0145918   | 0.00214424 | -0.047  | 0.0727 | 0.695191 |
| rs4616820  | 4  | 57745481  | C | T | 0.012479    | 0.00199079 | -0.0421 | 0.0667 | 0.535048 |

|            |    |           |   |   |             |            |         |        |          |
|------------|----|-----------|---|---|-------------|------------|---------|--------|----------|
| rs4738684  | 8  | 59393273  | A | G | -0.00994588 | 0.00208683 | 0.0141  | 0.0725 | 0.334508 |
| rs541041   | 2  | 21294975  | G | A | 0.0152241   | 0.00255168 | 0.0821  | 0.085  | 0.180809 |
| rs55829990 | 15 | 63790642  | T | C | 0.0191915   | 0.00207492 | 0.0089  | 0.0695 | 0.655979 |
| rs590215   | 18 | 57904088  | C | T | 0.00462051  | 0.00222766 | 0.0838  | 0.0782 | 0.734097 |
| rs6003456  | 22 | 23356100  | T | A | 0.0122883   | 0.00233244 | -0.0071 | 0.0824 | 0.765364 |
| rs613808   | 11 | 116710968 | A | G | -0.024948   | 0.00220937 | 0.1353  | 0.0747 | 0.279985 |
| rs61891388 | 11 | 66079818  | T | G | -0.0115084  | 0.00198127 | -0.0365 | 0.0673 | 0.544054 |
| rs62007299 | 15 | 77711719  | G | A | 0.0116231   | 0.00217065 | 0.0333  | 0.0739 | 0.287451 |
| rs6672758  | 1  | 230303512 | C | T | -0.0146302  | 0.0024755  | -0.1721 | 0.0851 | 0.199137 |
| rs6782190  | 3  | 85639672  | G | A | 0.0189106   | 0.00205644 | -0.0788 | 0.0689 | 0.352497 |
| rs6966728  | 7  | 104618318 | C | T | 0.0113076   | 0.00201049 | -0.0063 | 0.0667 | 0.537355 |
| rs705117   | 4  | 72608115  | C | T | 0.0317739   | 0.00276853 | -0.05   | 0.0984 | 0.147721 |
| rs7149014  | 14 | 29802911  | T | C | 0.0107334   | 0.0020584  | 0.1049  | 0.0691 | 0.370816 |
| rs727857   | 2  | 58981967  | G | A | 0.0109766   | 0.00203429 | -0.044  | 0.0681 | 0.388495 |
| rs72834856 | 6  | 22801858  | T | G | 0.0251376   | 0.00379985 | -0.0928 | 0.1298 | 0.927943 |
| rs72997623 | 11 | 75488054  | C | A | -0.0257654  | 0.00353337 | -0.1364 | 0.1145 | 0.915323 |
| rs7522116  | 1  | 41835685  | C | T | 0.012542    | 0.00199858 | 0.1021  | 0.0676 | 0.433716 |
| rs7528419  | 1  | 109817192 | A | G | -0.019866   | 0.00235556 | 0.03    | 0.0817 | 0.775305 |
| rs7569755  | 2  | 118648261 | G | A | -0.0135962  | 0.00218248 | -0.0163 | 0.0728 | 0.709372 |
| rs75741381 | 7  | 100809458 | C | G | 0.0137731   | 0.00278718 | -0.1322 | 0.0932 | 0.852317 |
| rs7604788  | 2  | 21190024  | C | T | -0.0352194  | 0.0054801  | 0.1844  | 0.1992 | 0.966596 |
| rs77532868 | 10 | 88081438  | C | T | -0.0230071  | 0.0043429  | 0.1326  | 0.1812 | 0.945978 |
| rs7784802  | 7  | 64015379  | A | T | -0.0129774  | 0.00204446 | 0.0769  | 0.073  | 0.639012 |
| rs78151190 | 6  | 25619007  | A | C | 0.0179172   | 0.00293406 | -0.0572 | 0.103  | 0.871246 |
| rs78649910 | 4  | 3482213   | T | A | 0.019983    | 0.00320891 | 0.0008  | 0.1054 | 0.893826 |
| rs8018720  | 14 | 39556185  | G | C | 0.0299593   | 0.0025742  | 0.0342  | 0.0901 | 0.176691 |
| rs804281   | 8  | 11611865  | A | G | -0.0161836  | 0.00199452 | -0.0266 | 0.0684 | 0.416402 |
| rs8091117  | 18 | 28919794  | C | A | 0.0241938   | 0.0039757  | 0.0411  | 0.1275 | 0.934736 |

|           |    |           |   |   |            |            |         |        |          |
|-----------|----|-----------|---|---|------------|------------|---------|--------|----------|
| rs8113404 | 19 | 53065579  | C | T | -0.0115758 | 0.00214261 | -0.0452 | 0.0729 | 0.695417 |
| rs867772  | 1  | 220972343 | A | G | 0.0147054  | 0.00212274 | -0.1675 | 0.0741 | 0.315533 |
| rs9476310 | 6  | 57767576  | C | T | -0.0108729 | 0.00197437 | -0.0008 | 0.0667 | 0.488661 |
| rs9490317 | 6  | 121859499 | T | C | -0.0106658 | 0.00198507 | -0.0659 | 0.0665 | 0.554066 |
| rs964184  | 11 | 116648917 | G | C | -0.0414009 | 0.00290504 | 0.1177  | 0.0943 | 0.131625 |
| rs9861009 | 3  | 141654685 | T | C | -0.0139778 | 0.00222312 | 0.0095  | 0.0739 | 0.272456 |

**Table S4. Sensitivity analysis using Multivariable MR.**

|               | MV MR<br>VitD - SBP       | MV MR<br>VitD - LDL-C     | MV MR<br>VitD - Longevity |
|---------------|---------------------------|---------------------------|---------------------------|
|               | OR (95%CI; p)             | OR (95%CI; p)             | OR (95%CI; p)             |
| All ICH       | 1.61 (1.05-2.4; p=0.03)   | 1.65 (1.07-2.53; p=0.02)  | 1.58 (1.04-2.41; p=0.03)  |
| Lobar ICH     | 1.43 (0.85-1.43; p=0.17)  | 1.44 (0.86-1.44; p=0.16)  | 1.42 (0.85-2.37; p=0.18)  |
| Non-Lobar ICH | 1.88 (1.18-2.99; p=0.008) | 1.97 (1.24-3.13; p=0.004) | 1.85 (1.17-2.94; p=0.009) |

SBP= systolic blood pressure. LDL-C = Low density lipoprotein cholesterol. ICH = Intracerebral hemorrhage. VitD = Vitamin D. OR = odds ratio. 95%CI = 95% confidence interval.

Figure S1. The leave-one-out plot for all ICH.

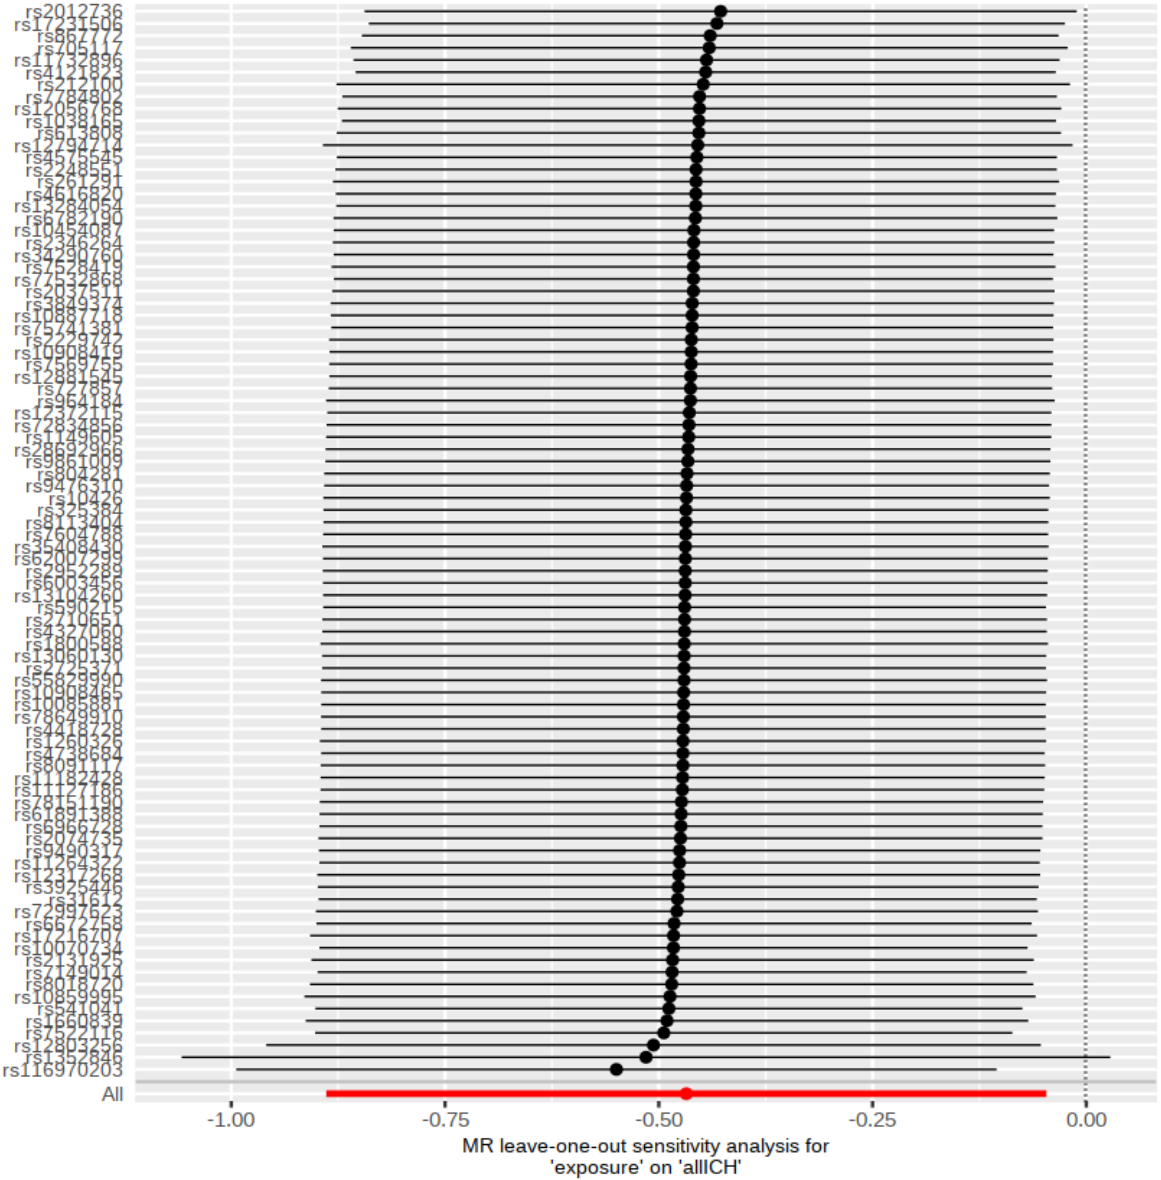

Figure S2. The leave-one-out plots for lobar ICH.

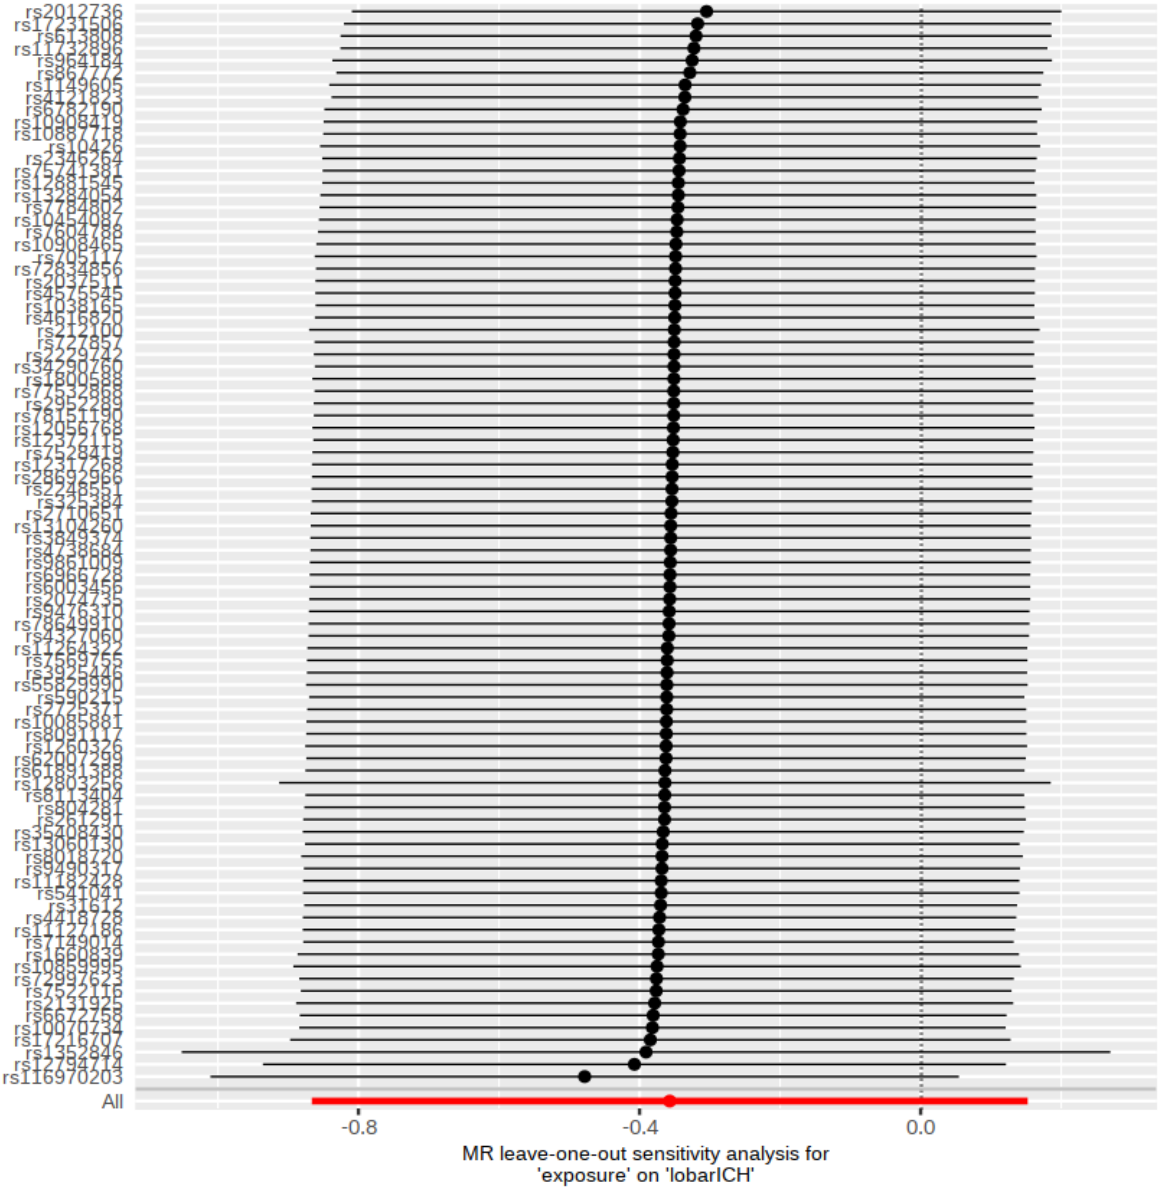



Figure S3. The leave-one-out plots for non-lobar ICH.

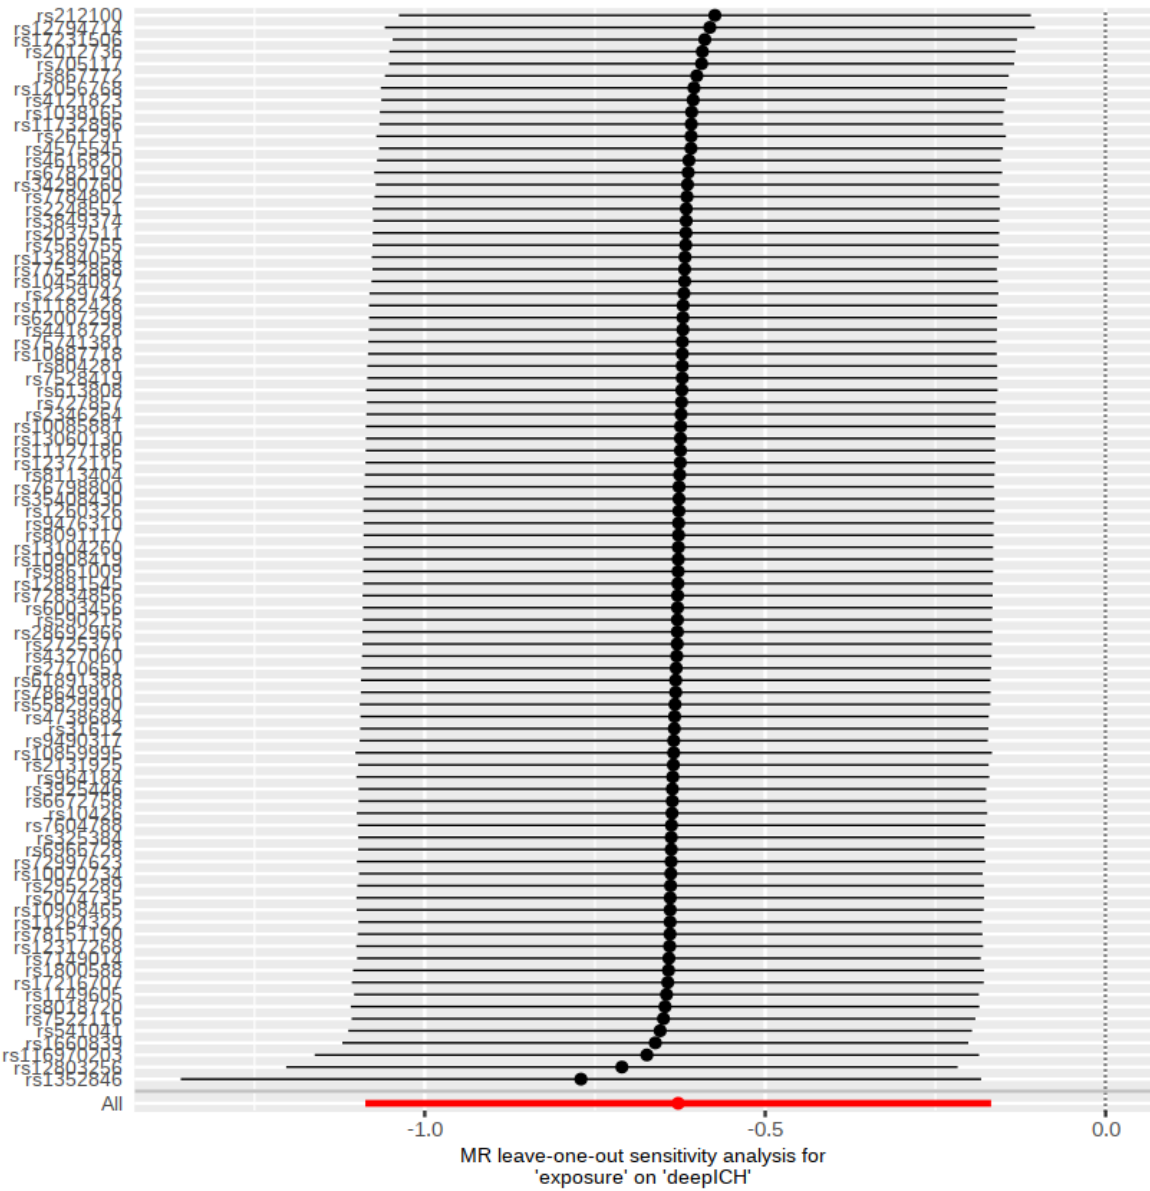

Figure S4. The Cook's distance plot for all ICH.

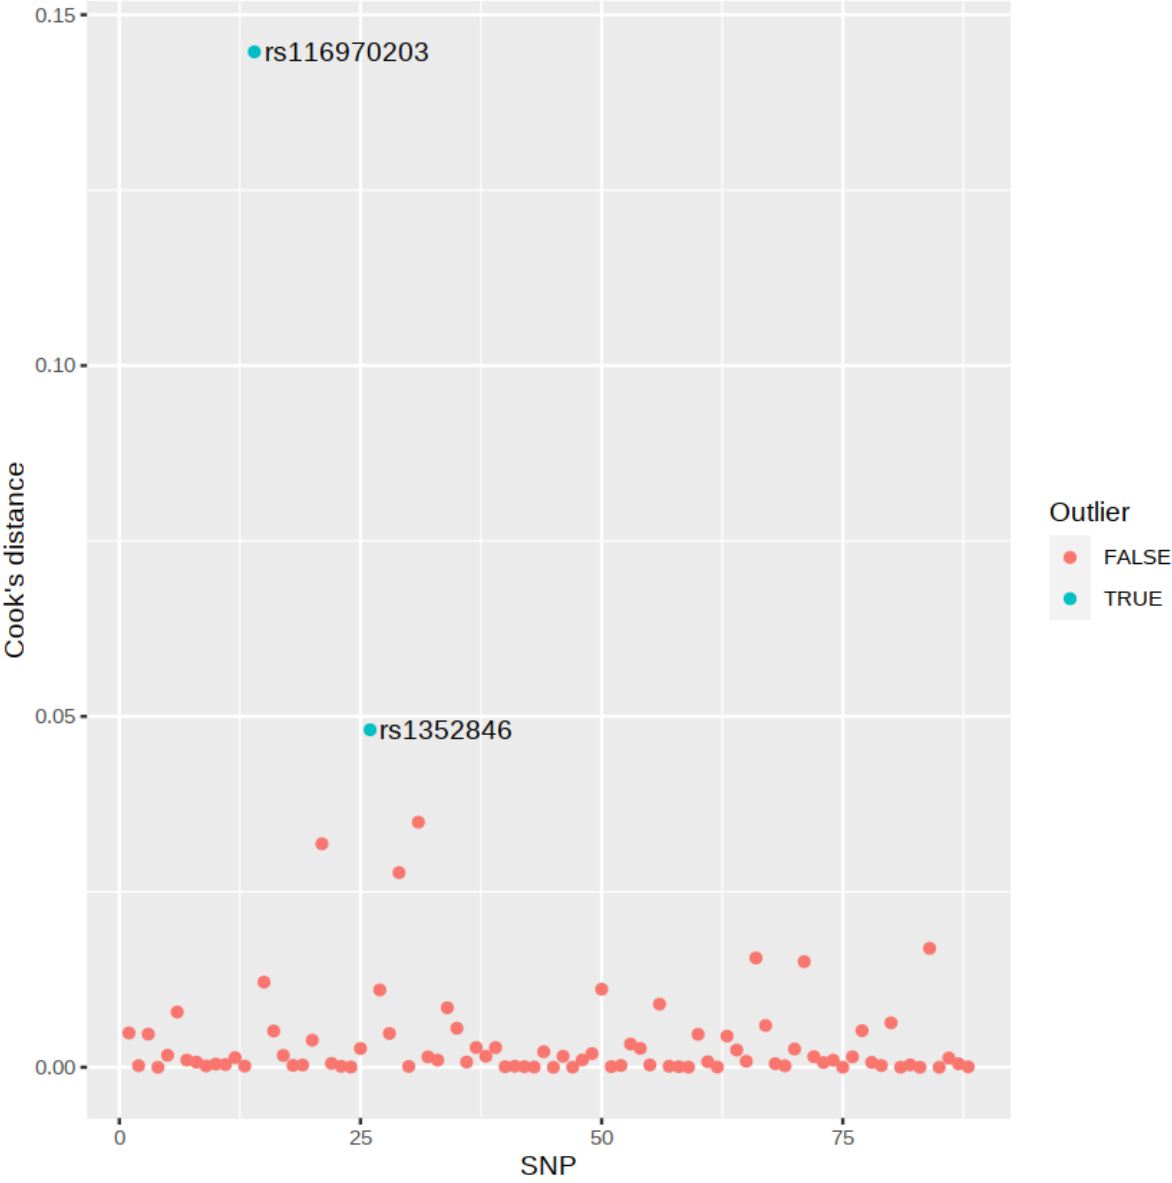

Figure S5. The Cook's distance plot for lobar ICH.

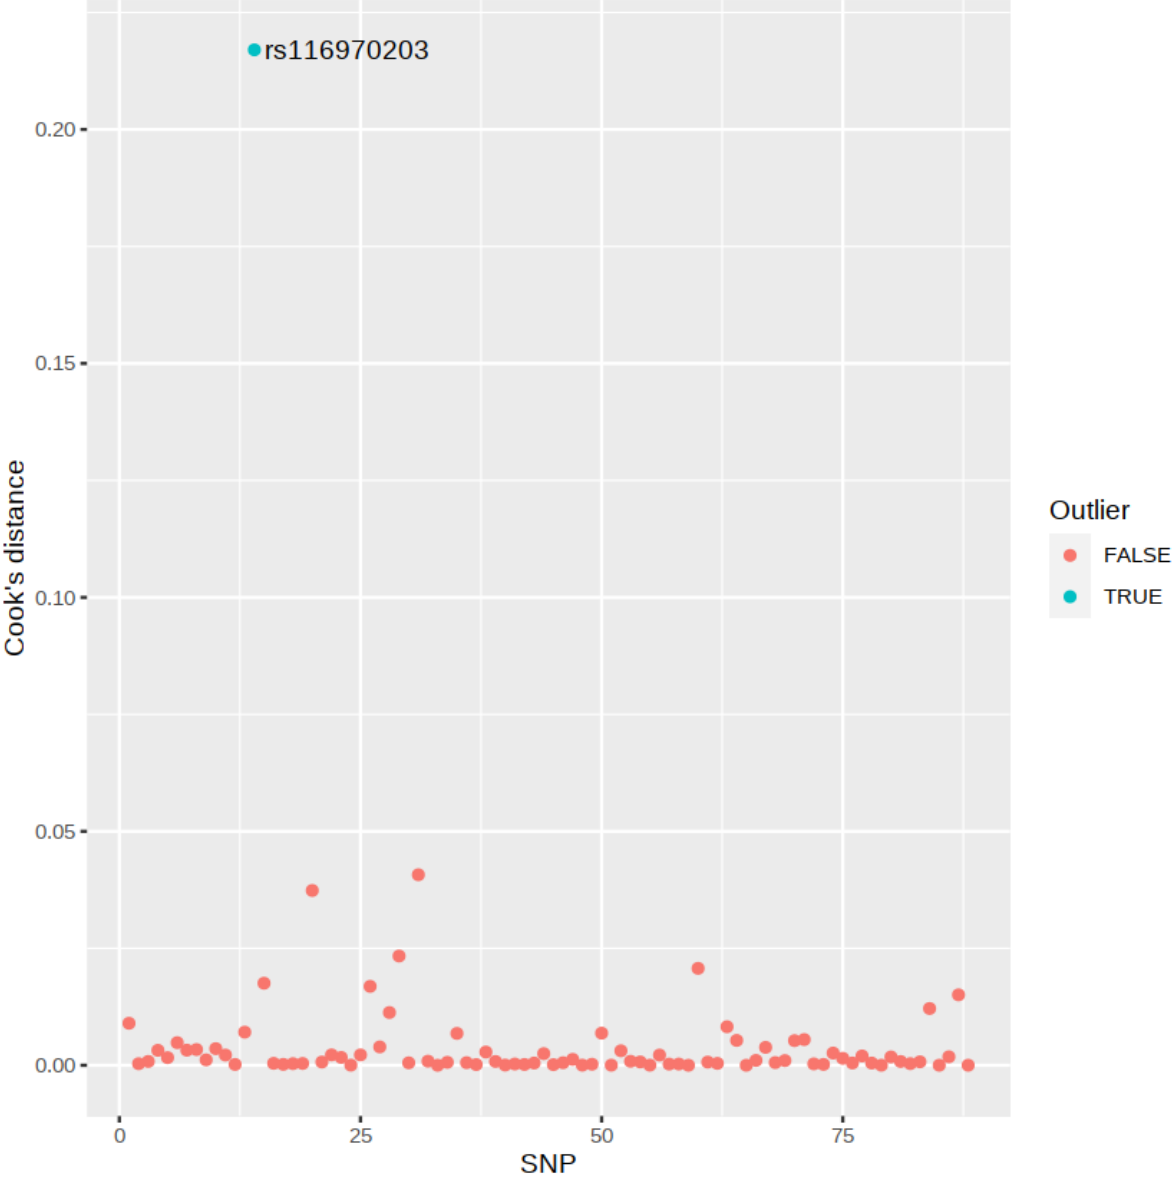

Figure S6. The Cook's distance plot for non-lobar ICH.

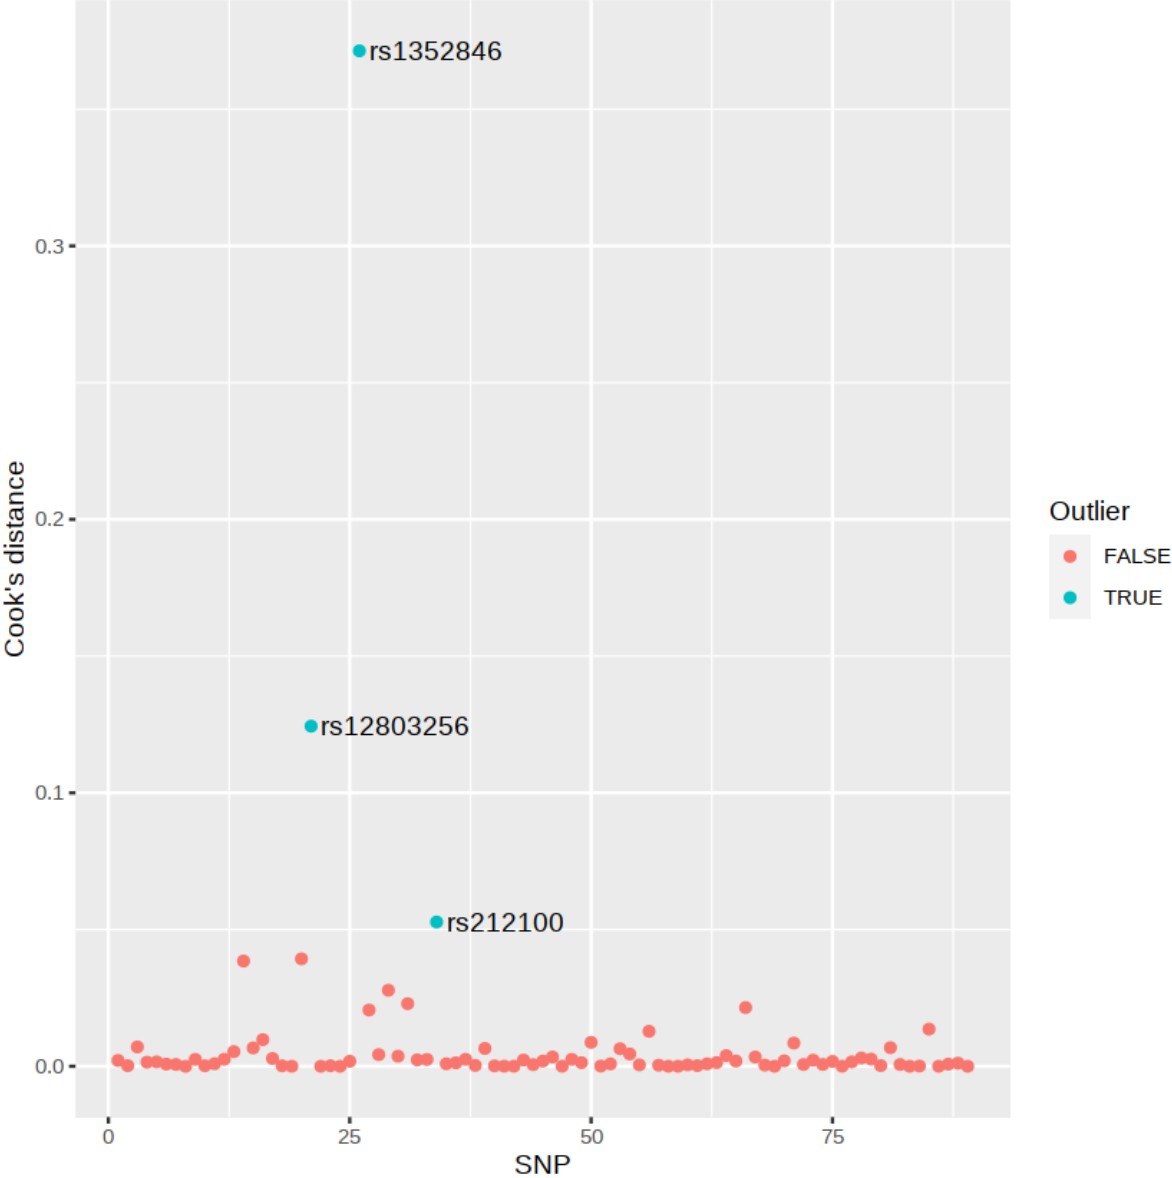

Supplement: JAH3-11-e024141-s001.pdf [file JAH3-11-e024141-s001.pdf]
